# Supplementary material
Source: publisher figshare collection journal article supplement (https://rs.figshare.com/ndownloader/files/39632424)
Supplement: Supplementary file 1 [file 39632424]

Carrasco-Tenezaca *et al.* Effect of passive and active ventilation on malaria mosquito-house entry and human comfort: an experimental study in rural Gambia. Journal of the Royal Society Interface.

**Supplementary material**

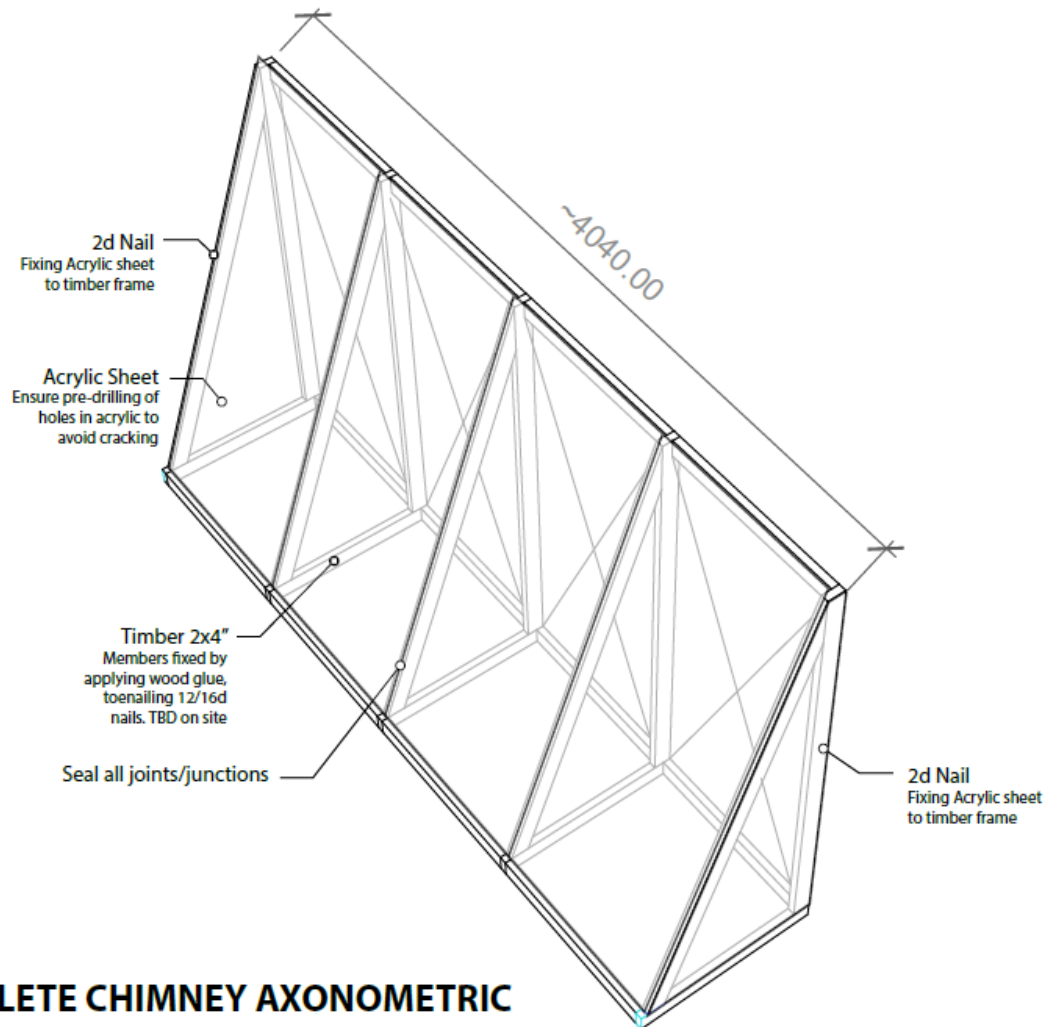

**COMPLETE CHIMNEY AXONOMETRIC**  
Not To Scale

**Figure S1. Axonometric view of solar wall**

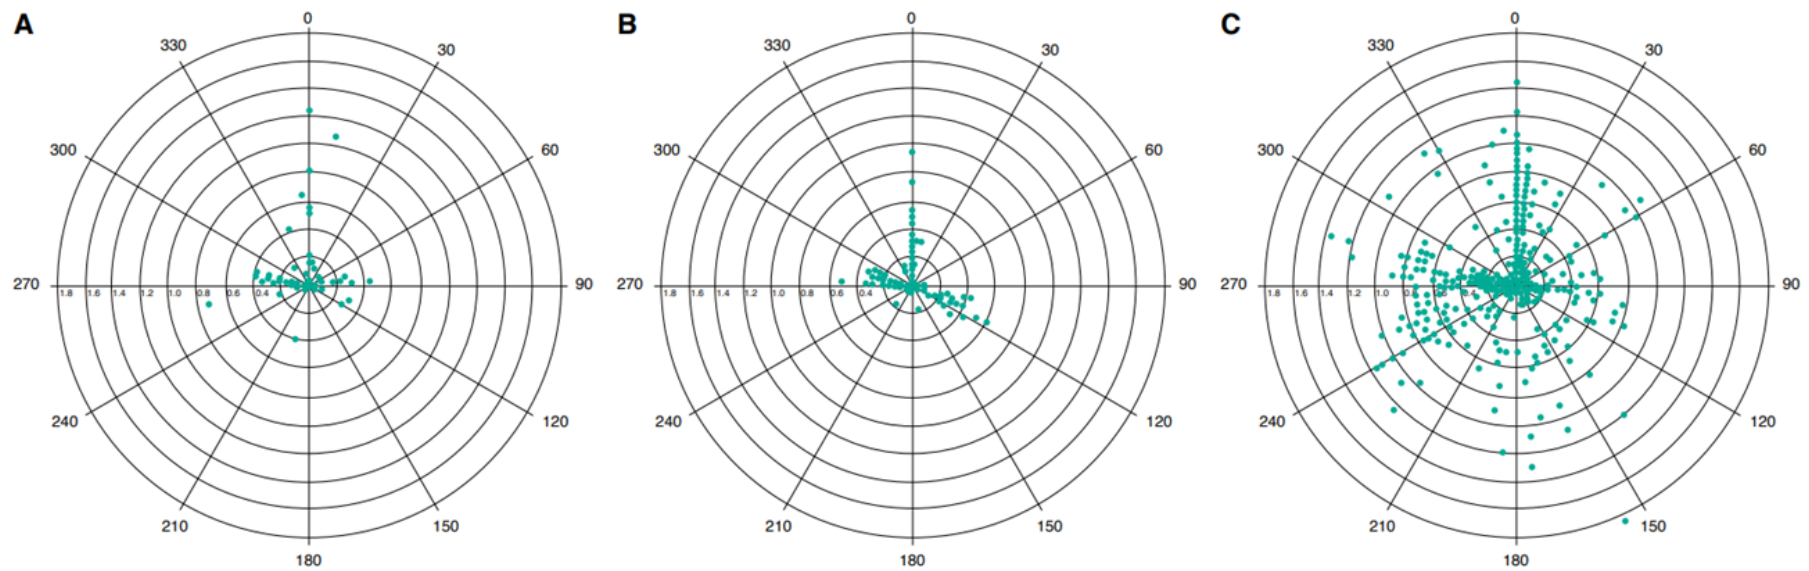

**Figure S2. Wind rose showing wind speed (in m/s) and direction during the Solar chimney experiment. Where A= first part of the night (21.00 h to 23.59 h), B= second part of the night (00.00 h to 07.00 h) and C= day**

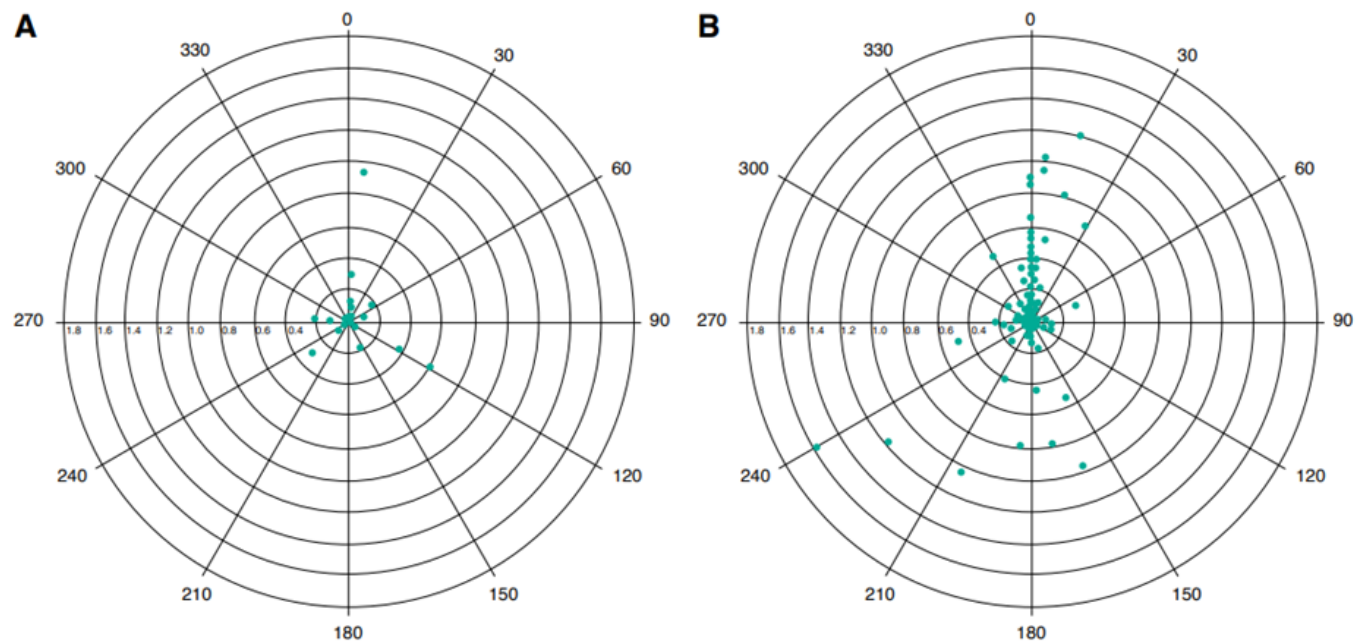

**Figure S3. Wind rose showing wind speed (in m/s) and direction during the ceiling fans experiment. Where A= first part of the night (21.00 h to 23.59 h) and B= second part of the night (00.00 h to 07.00 h)**

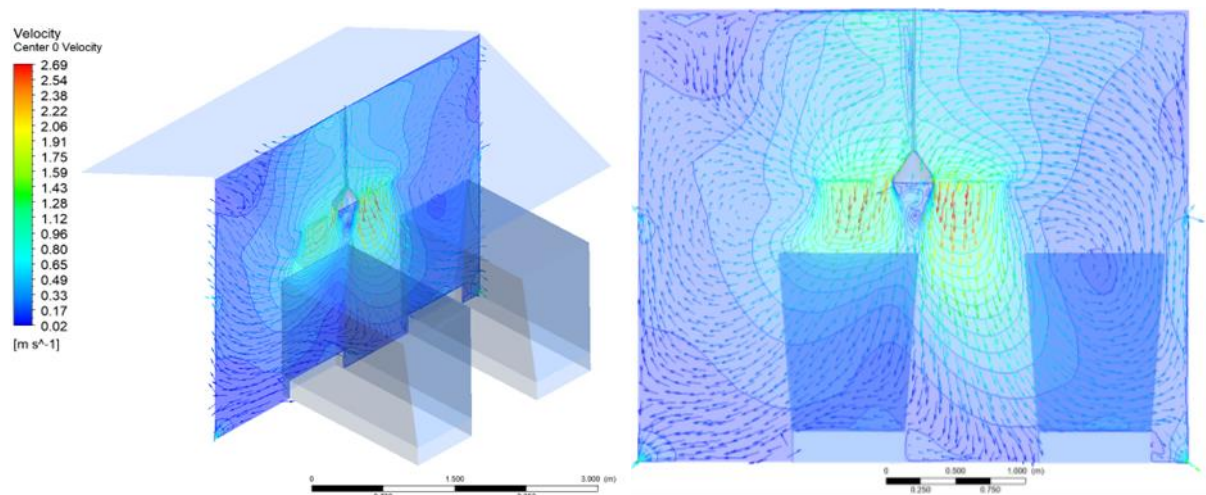

**Figure S4. Velocity plot in the house with ceiling fan**

The fan induces an air speed of 2.69 m/s, which is reduced when it passes through the bednet, and eventually becomes 0.36 m/s on average when it reaches the sleepers.

**Table S1. Relative humidity during experiment 1.**

RH= relative humidity. Linear regression results, adjusted for house position, sleeper pair and night

| House typology | Time period                     |                      |         |                                 |                      |         |                                 |                      |         |
|----------------|---------------------------------|----------------------|---------|---------------------------------|----------------------|---------|---------------------------------|----------------------|---------|
|                | 21.00 h to 23.30 h              |                      |         | 00.00 h to 07.00 h              |                      |         | 07.30 h to 20.30 h              |                      |         |
|                | Unadjusted mean RH (%) (95% CI) | Coefficient (95% CI) | P value | Unadjusted mean RH (%) (95% CI) | Coefficient (95% CI) | P value | Unadjusted mean RH (%) (95% CI) | Coefficient (95% CI) | P value |
| Outdoors       |                                 | -                    | -       |                                 | -                    | -       |                                 | -                    | -       |
| Control        | 75.1 (72.6 – 77.5)              | -                    | -       | 77.1 (75.1 – 79.0)              | -                    | -       | 71.0 (68.7 – 73.4)              | -                    | -       |
| Chimney        | 74.9 (72.5 – 77.3)              | -0.18 (-0.63 – 0.28) | 0.44    | 77.3 (75.4 – 79.2)              | 0.22 (-0.19 – 0.64)  | 0.29    | 70.7 (68.3 – 73.0)              | -0.39 (-0.88 – 0.11) | 0.12    |

**Table S2. Mosquito collection for all experimental nights in both experiments.**

|                              | Solar chimneys |              | Fans    |              |
|------------------------------|----------------|--------------|---------|--------------|
|                              | Control        | Intervention | Control | Intervention |
| <i>An. gambiae</i> female    | 132            | 114          | 101     | 37           |
| <i>An. gambiae</i> male      | 2              | 8            | 2       | 0            |
| <i>An. pharoensis</i> female | 4              | 4            | 0       | 0            |
| <i>An. pharoensis</i> male   | 1              | 2            | 0       | 0            |

|                              |      |      |      |     |
|------------------------------|------|------|------|-----|
| <i>An. ziemani</i> female    | 1    | 2    | 1    | 3   |
| <i>An. ziemani</i> male      | 1    | 0    | 0    | 0   |
| <i>An. rufipes</i> female    | 0    | 1    | 10   | 4   |
| <i>An. rufipes</i> male      | 0    | 0    | 0    | 0   |
| <i>An. funestus</i> female   | 0    | 1    | 1    | 1   |
| <i>An. funestus</i> male     | 0    | 0    | 0    | 0   |
| <i>An. squamosus</i> female  | 1    | 3    | 1    | 0   |
| <i>An. squamosus</i> male    | 1    | 1    | 0    | 0   |
| <i>Culex</i> spp. female     | 10   | 15   | 14   | 5   |
| <i>Culex</i> spp. male       | 2    | 6    | 2    | 1   |
| <i>Cx. thalassius</i> female | 12   | 10   | 19   | 4   |
| <i>Cx. thalassius</i> male   | 0    | 1    | 0    | 0   |
| <i>Mansonia</i> spp female   | 1008 | 1231 | 2491 | 978 |
| <i>Mansonia</i> spp male     | 0    | 5    | 2    | 1   |
| <i>Aedes aegypti</i> female  | 3    | 6    | 0    | 0   |
| <i>Aedes aegypti</i> male    | 0    | 1    | 0    | 0   |

**Table S3. Relative humidity during experiment 2.**

RH = relative humidity. Linear regression results, adjusted for house position, sleeper pair and night

| House typology    | Time period                     |                      |         |                                 |                      |         |
|-------------------|---------------------------------|----------------------|---------|---------------------------------|----------------------|---------|
|                   | 21.00 h to 23.30 h              |                      |         | 00.00 h to 07.00 h              |                      |         |
|                   | Unadjusted mean RH (%) (95% CI) | Coefficient (95% CI) | P value | Unadjusted mean RH (%) (95% CI) | Coefficient (95% CI) | P value |
| Outdoors          | 98.8 (97.9 – 99.6)              | -                    | -       | 99.3 (98.9 – 99.7)              | -                    | -       |
| Control (fan off) | 79.1 (77.9 – 80.3)              | -                    | -       | 80.0 (78.9 – 81.2)              | -                    | -       |
| Fan on            | 78.2 (77.4 – 79.0)              | -0.20 (-0.78 – 0.37) | 0.49    | 79.4 (78.7 – 80.0)              | -0.21 (-0.70 – 0.29) | 0.42    |
